# Supplementary material for: Multi-omics analyses reveal the crosstalk between the circadian clock and the response to herbicide application in Oryza sativa
Source: Front Plant Sci. 2023 Mar 24;14:1155258. doi: 10.3389/fpls.2023.1155258 (PMC10080033; doi:10.3389/fpls.2023.1155258)
Supplement: Supplementary file 2 [file Table_1.xlsx]

## Sheet: TableS1
Supplementary Table 1. Number of differential metabolites after s-metolachlor and GA3 application.
Condition	Number of differential metabolites	Number of induced metabolites	Number of suppressed metabolites
S-metolachlor application	34	20	14
GA3 application	46	31	15

## Sheet: TableS2
Supplementary Table 2. Sources of download data used in this article.
Herbicide response dataset				Herbicide response dataset
Sequencing Type	Pesticides used	Platform	Database	Accession	Reference
Metabolomics	Butachlor	GC-MS	Unknown	Unknown	Liu N and Zhu L, Metabolomic and transcriptomic investigation of metabolic perturbations in Oryza sativa L. triggered by three pesticides. Environmental Science & Technology 54: 6115-6124 (2020).
Metabolomics	Chlorpyrifos	GC-MS	Unknown	Unknown	Liu N and Zhu L, Metabolomic and transcriptomic investigation of metabolic perturbations in Oryza sativa L. triggered by three pesticides. Environmental Science & Technology 54: 6115-6124 (2020).
Metabolomics	Tricyclazole	GC-MS	Unknown	Unknown	Liu N and Zhu L, Metabolomic and transcriptomic investigation of metabolic perturbations in Oryza sativa L. triggered by three pesticides. Environmental Science & Technology 54: 6115-6124 (2020).
RNA-sequencing	Glyphosate	Illumina HiSeq 4000	NCBI Gene Expression Omnibus (GEO) repository	GSE142323, GSE142266	Zhai R, Ye S, Zhu G, Lu Y, Ye J, Yu F, et al., Identification and integrated analysis of glyphosate stress-responsive microRNAs, lncRNAs, and mRNAs in rice using genome-wide high-throughput sequencing. BMC genomics 21: 1-15 (2020).
RNA-sequencing	fenclorim	Illumina HiSeq 2500	NCBI Sequence Read Archive (SRA) database	PRJNA560668	Hu L, Yao Y, Cai R, Pan L, Liu K and Bai L, Effects of fenclorim on rice physiology, gene transcription and pretilachlor detoxification ability. BMC plant biology 20: 1-12 (2020).
RNA-sequencing	metcamifen	Illumina HiSeq 2000	NCBI Sequence Read Archive (SRA) database	PRJNA513017
Time-scale dataset				Time-scale dataset
Sequencing Type	Time span	Platform	Database	Accession	Reference
Metabolomics	24 hours	quadrupole time of flight (QTOF) system	Unknown	Unknown	Zhou J, Liu C, Chen Q, Liu L, Niu S, Chen R, et al., Integration of rhythmic metabolome and transcriptome provides insights into the transmission of rhythmic fluctuations and temporal diversity of metabolism in rice. Science China Life Sciences: 1-17 (2022).
RNA-sequencing	48 hours	Illumina HiSeq v4 reagents	NCBI Gene Expression Omnibus (GEO) repository	GSE138193	Li Y, Lu Y, Zhou Y, Wei X, Peng Y, Dai Y, et al., Diurnal transcriptomics analysis reveals the regulatory role of the circadian rhythm in super-hybrid rice LY2186. Genomics 113: 1281-1290 (2021).

## Sheet: TableS3
Supplementary Table 3. CGs in response to glyphosate application.
Gene
ChrSy.fgenesh.gene.25
ChrUn.fgenesh.gene.73
ChrUn.fgenesh.gene.76
LOC_Os01g01290
LOC_Os01g02000
LOC_Os01g02130
LOC_Os01g03100
LOC_Os01g03870
LOC_Os01g04330
LOC_Os01g04360
LOC_Os01g04590
LOC_Os01g04620
LOC_Os01g04800
LOC_Os01g05064
LOC_Os01g05610
LOC_Os01g05630
LOC_Os01g05870
LOC_Os01g05900
LOC_Os01g05970
LOC_Os01g06010
LOC_Os01g06220
LOC_Os01g06550
LOC_Os01g06640
LOC_Os01g07390
LOC_Os01g07810
LOC_Os01g07890
LOC_Os01g07920
LOC_Os01g07990
LOC_Os01g08100
LOC_Os01g08310
LOC_Os01g08370
LOC_Os01g08440
LOC_Os01g08460
LOC_Os01g08780
LOC_Os01g08930
LOC_Os01g09020
LOC_Os01g09300
LOC_Os01g09370
LOC_Os01g09384
LOC_Os01g09410
LOC_Os01g09420
LOC_Os01g09540
LOC_Os01g09870
LOC_Os01g10090
LOC_Os01g10140
LOC_Os01g10990
LOC_Os01g11130
LOC_Os01g11980
LOC_Os01g12130
LOC_Os01g12210
LOC_Os01g12304
LOC_Os01g12330
LOC_Os01g13300
LOC_Os01g13550
LOC_Os01g13620
LOC_Os01g14050
LOC_Os01g14410
LOC_Os01g14440
LOC_Os01g14520
LOC_Os01g15000
LOC_Os01g15270
LOC_Os01g15520
LOC_Os01g16810
LOC_Os01g20110
LOC_Os01g22230
LOC_Os01g22640
LOC_Os01g23610
LOC_Os01g24070
LOC_Os01g25010
LOC_Os01g25189
LOC_Os01g25740
LOC_Os01g25810
LOC_Os01g26020
LOC_Os01g26240
LOC_Os01g26970
LOC_Os01g27050
LOC_Os01g27140
LOC_Os01g28150
LOC_Os01g28300
LOC_Os01g28690
LOC_Os01g29820
LOC_Os01g30956
LOC_Os01g31810
LOC_Os01g31850
LOC_Os01g32364
LOC_Os01g32780
LOC_Os01g34610
LOC_Os01g34850
LOC_Os01g34860
LOC_Os01g34880
LOC_Os01g34890
LOC_Os01g36294
LOC_Os01g36610
LOC_Os01g37510
LOC_Os01g38229
LOC_Os01g38510
LOC_Os01g38530
LOC_Os01g39840
LOC_Os01g40000
LOC_Os01g40280
LOC_Os01g40730
LOC_Os01g40820
LOC_Os01g40870
LOC_Os01g40980
LOC_Os01g41750
LOC_Os01g41770
LOC_Os01g41800
LOC_Os01g43040
LOC_Os01g43590
LOC_Os01g44110
LOC_Os01g45530
LOC_Os01g45830
LOC_Os01g47190
LOC_Os01g47330
LOC_Os01g47570
LOC_Os01g47690
LOC_Os01g48000
LOC_Os01g48500
LOC_Os01g48620
LOC_Os01g49280
LOC_Os01g50310
LOC_Os01g50616
LOC_Os01g50622
LOC_Os01g51250
LOC_Os01g51920
LOC_Os01g53020
LOC_Os01g54540
LOC_Os01g54590
LOC_Os01g55240
LOC_Os01g55290
LOC_Os01g55300
LOC_Os01g55310
LOC_Os01g55974
LOC_Os01g56630
LOC_Os01g56860
LOC_Os01g57350
LOC_Os01g57410
LOC_Os01g58280
LOC_Os01g58500
LOC_Os01g58870
LOC_Os01g59000
LOC_Os01g59090
LOC_Os01g59560
LOC_Os01g60250
LOC_Os01g60830
LOC_Os01g61070
LOC_Os01g61080
LOC_Os01g61120
LOC_Os01g61320
LOC_Os01g61620
LOC_Os01g61920
LOC_Os01g62230
LOC_Os01g62570
LOC_Os01g63050
LOC_Os01g63460
LOC_Os01g63690
LOC_Os01g63930
LOC_Os01g64350
LOC_Os01g64520
LOC_Os01g64730
LOC_Os01g65550
LOC_Os01g65560
LOC_Os01g65880
LOC_Os01g65904
LOC_Os01g65920
LOC_Os01g66010
LOC_Os01g66240
LOC_Os01g66350
LOC_Os01g66830
LOC_Os01g67360
LOC_Os01g67520
LOC_Os01g67570
LOC_Os01g67580
LOC_Os01g69010
LOC_Os01g69070
LOC_Os01g69120
LOC_Os01g70130
LOC_Os01g70220
LOC_Os01g70460
LOC_Os01g72170
LOC_Os01g72370
LOC_Os01g72650
LOC_Os01g73080
LOC_Os01g73910
LOC_Os01g73940
LOC_Os01g74160
LOC_Os02g01220
LOC_Os02g01590
LOC_Os02g01890
LOC_Os02g02380
LOC_Os02g02410
LOC_Os02g02460
LOC_Os02g02540
LOC_Os02g03020
LOC_Os02g03430
LOC_Os02g03640
LOC_Os02g03670
LOC_Os02g03710
LOC_Os02g03960
LOC_Os02g04160
LOC_Os02g04325
LOC_Os02g04369
LOC_Os02g04460
LOC_Os02g04500
LOC_Os02g04510
LOC_Os02g04640
LOC_Os02g05250
LOC_Os02g05744
LOC_Os02g05830
LOC_Os02g05960
LOC_Os02g07010
LOC_Os02g07110
LOC_Os02g07690
LOC_Os02g07820
LOC_Os02g07960
LOC_Os02g08080
LOC_Os02g08100
LOC_Os02g09240
LOC_Os02g09390
LOC_Os02g10580
LOC_Os02g10860
LOC_Os02g11700
LOC_Os02g12030
LOC_Os02g13300
LOC_Os02g13350
LOC_Os02g13430
LOC_Os02g13800
LOC_Os02g14440
LOC_Os02g15540
LOC_Os02g16630
LOC_Os02g16670
LOC_Os02g17710
LOC_Os02g18540
LOC_Os02g19530
LOC_Os02g20210
LOC_Os02g21340
LOC_Os02g27000
LOC_Os02g27310
LOC_Os02g29300
LOC_Os02g29380
LOC_Os02g30190
LOC_Os02g32900
LOC_Os02g33450
LOC_Os02g33610
LOC_Os02g34930
LOC_Os02g36880
LOC_Os02g37654
LOC_Os02g37700
LOC_Os02g38020
LOC_Os02g38450
LOC_Os02g38494
LOC_Os02g38970
LOC_Os02g39850
LOC_Os02g39930
LOC_Os02g40664
LOC_Os02g41590
LOC_Os02g42310
LOC_Os02g42585
LOC_Os02g42880
LOC_Os02g43600
LOC_Os02g43940
LOC_Os02g44290
LOC_Os02g44360
LOC_Os02g44704
LOC_Os02g44820
LOC_Os02g45010
LOC_Os02g45940
LOC_Os02g46260
LOC_Os02g46460
LOC_Os02g46660
LOC_Os02g46850
LOC_Os02g46990
LOC_Os02g47020
LOC_Os02g47760
LOC_Os02g47830
LOC_Os02g47920
LOC_Os02g48360
LOC_Os02g48640
LOC_Os02g49840
LOC_Os02g49850
LOC_Os02g49880
LOC_Os02g50060
LOC_Os02g50570
LOC_Os02g50990
LOC_Os02g51790
LOC_Os02g51930
LOC_Os02g52150
LOC_Os02g53350
LOC_Os02g53400
LOC_Os02g55050
LOC_Os02g55540
LOC_Os02g55560
LOC_Os02g57250
LOC_Os02g57720
LOC_Os03g01365
LOC_Os03g01570
LOC_Os03g01750
LOC_Os03g01760
LOC_Os03g01790
LOC_Os03g02710
LOC_Os03g02780
LOC_Os03g03120
LOC_Os03g04100
LOC_Os03g04270
LOC_Os03g05530
LOC_Os03g05620
LOC_Os03g06230
LOC_Os03g06610
LOC_Os03g06630
LOC_Os03g07570
LOC_Os03g07990
LOC_Os03g08400
LOC_Os03g10320
LOC_Os03g10640
LOC_Os03g11340
LOC_Os03g11420
LOC_Os03g11560
LOC_Os03g11614
LOC_Os03g11650
LOC_Os03g11734
LOC_Os03g12520
LOC_Os03g12530
LOC_Os03g12890
LOC_Os03g13050
LOC_Os03g14040
LOC_Os03g14310
LOC_Os03g14370
LOC_Os03g15033
LOC_Os03g15230
LOC_Os03g15870
LOC_Os03g15960
LOC_Os03g16010
LOC_Os03g16150
LOC_Os03g16400
LOC_Os03g16780
LOC_Os03g17084
LOC_Os03g17100
LOC_Os03g17120
LOC_Os03g17410
LOC_Os03g17634
LOC_Os03g17780
LOC_Os03g17800
LOC_Os03g18170
LOC_Os03g18470
LOC_Os03g18710
LOC_Os03g19350
LOC_Os03g19380
LOC_Os03g19390
LOC_Os03g20330
LOC_Os03g20380
LOC_Os03g21040
LOC_Os03g21080
LOC_Os03g21230
LOC_Os03g21419
LOC_Os03g21500
LOC_Os03g21530
LOC_Os03g22259
LOC_Os03g27230
LOC_Os03g28380
LOC_Os03g29410
LOC_Os03g29770
LOC_Os03g30830
LOC_Os03g31760
LOC_Os03g32420
LOC_Os03g32499
LOC_Os03g32550
LOC_Os03g32620
LOC_Os03g37350
LOC_Os03g37360
LOC_Os03g37394
LOC_Os03g37470
LOC_Os03g38720
LOC_Os03g38745
LOC_Os03g40540
LOC_Os03g40650
LOC_Os03g40770
LOC_Os03g41070
LOC_Os03g42280
LOC_Os03g42830
LOC_Os03g43010
LOC_Os03g43420
LOC_Os03g44710
LOC_Os03g45400
LOC_Os03g47610
LOC_Os03g47810
LOC_Os03g49260
LOC_Os03g50080
LOC_Os03g51200
LOC_Os03g52660
LOC_Os03g52820
LOC_Os03g53050
LOC_Os03g53540
LOC_Os03g53710
LOC_Os03g53860
LOC_Os03g54040
LOC_Os03g55090
LOC_Os03g55260
LOC_Os03g56600
LOC_Os03g56800
LOC_Os03g57310
LOC_Os03g57330
LOC_Os03g58470
LOC_Os03g59200
LOC_Os03g59240
LOC_Os03g59340
LOC_Os03g59450
LOC_Os03g59570
LOC_Os03g60080
LOC_Os03g60100
LOC_Os03g60250
LOC_Os03g60509
LOC_Os03g61260
LOC_Os03g61829
LOC_Os03g62160
LOC_Os03g62630
LOC_Os03g62810
LOC_Os03g63900
LOC_Os03g63999
LOC_Os04g01130
LOC_Os04g02450
LOC_Os04g02900
LOC_Os04g03050
LOC_Os04g06734
LOC_Os04g10350
LOC_Os04g11450
LOC_Os04g11820
LOC_Os04g12140
LOC_Os04g14150
LOC_Os04g15660
LOC_Os04g16080
LOC_Os04g16160
LOC_Os04g18090
LOC_Os04g20474
LOC_Os04g20749
LOC_Os04g21350
LOC_Os04g21660
LOC_Os04g22390
LOC_Os04g22900
LOC_Os04g22910
LOC_Os04g24750
LOC_Os04g25490
LOC_Os04g26870
LOC_Os04g29680
LOC_Os04g30010
LOC_Os04g30030
LOC_Os04g30250
LOC_Os04g31030
LOC_Os04g31120
LOC_Os04g32950
LOC_Os04g33080
LOC_Os04g33600
LOC_Os04g33610
LOC_Os04g33630
LOC_Os04g34230
LOC_Os04g34320
LOC_Os04g34600
LOC_Os04g35420
LOC_Os04g35760
LOC_Os04g36570
LOC_Os04g37820
LOC_Os04g38290
LOC_Os04g38310
LOC_Os04g38530
LOC_Os04g38960
LOC_Os04g41160
LOC_Os04g41350
LOC_Os04g41360
LOC_Os04g44290
LOC_Os04g44530
LOC_Os04g44750
LOC_Os04g44930
LOC_Os04g45290
LOC_Os04g45580
LOC_Os04g45970
LOC_Os04g46180
LOC_Os04g47170
LOC_Os04g47320
LOC_Os04g47370
LOC_Os04g47680
LOC_Os04g48480
LOC_Os04g49194
LOC_Os04g49370
LOC_Os04g49410
LOC_Os04g49460
LOC_Os04g49670
LOC_Os04g49739
LOC_Os04g49748
LOC_Os04g50790
LOC_Os04g51130
LOC_Os04g51410
LOC_Os04g51880
LOC_Os04g52100
LOC_Os04g52130
LOC_Os04g52190
LOC_Os04g52260
LOC_Os04g52479
LOC_Os04g52900
LOC_Os04g53190
LOC_Os04g53740
LOC_Os04g53990
LOC_Os04g54230
LOC_Os04g54280
LOC_Os04g54300
LOC_Os04g55050
LOC_Os04g55180
LOC_Os04g55500
LOC_Os04g56710
LOC_Os04g56970
LOC_Os04g57020
LOC_Os04g57140
LOC_Os04g58700
LOC_Os04g58800
LOC_Os04g58810
LOC_Os04g59340
LOC_Os04g59480
LOC_Os05g01190
LOC_Os05g01530
LOC_Os05g01950
LOC_Os05g01970
LOC_Os05g02200
LOC_Os05g02690
LOC_Os05g03620
LOC_Os05g03640
LOC_Os05g03920
LOC_Os05g04120
LOC_Os05g04600
LOC_Os05g04610
LOC_Os05g05020
LOC_Os05g05590
LOC_Os05g07300
LOC_Os05g07870
LOC_Os05g07880
LOC_Os05g08610
LOC_Os05g08900
LOC_Os05g10940
LOC_Os05g11260
LOC_Os05g11320
LOC_Os05g14180
LOC_Os05g14940
LOC_Os05g17849
LOC_Os05g18280
LOC_Os05g18650
LOC_Os05g25370
LOC_Os05g27010
LOC_Os05g28200
LOC_Os05g29735
LOC_Os05g30750
LOC_Os05g31610
LOC_Os05g32420
LOC_Os05g32610
LOC_Os05g32710
LOC_Os05g32810
LOC_Os05g32820
LOC_Os05g32970
LOC_Os05g33080
LOC_Os05g34040
LOC_Os05g34160
LOC_Os05g34270
LOC_Os05g34470
LOC_Os05g34950
LOC_Os05g35200
LOC_Os05g35260
LOC_Os05g35910
LOC_Os05g37520
LOC_Os05g37730
LOC_Os05g37930
LOC_Os05g37950
LOC_Os05g38470
LOC_Os05g38740
LOC_Os05g39050
LOC_Os05g39770
LOC_Os05g40010
LOC_Os05g40212
LOC_Os05g41480
LOC_Os05g41950
LOC_Os05g42210
LOC_Os05g42230
LOC_Os05g44916
LOC_Os05g45410
LOC_Os05g45810
LOC_Os05g45920
LOC_Os05g45930
LOC_Os05g46040
LOC_Os05g46240
LOC_Os05g46520
LOC_Os05g47650
LOC_Os05g47850
LOC_Os05g47870
LOC_Os05g48810
LOC_Os05g49060
LOC_Os05g49070
LOC_Os05g49860
LOC_Os05g49920
LOC_Os05g50090
LOC_Os05g50380
LOC_Os05g50500
LOC_Os05g51110
LOC_Os05g51150
LOC_Os05g51190
LOC_Os05g51240
LOC_Os06g01250
LOC_Os06g01760
LOC_Os06g01972
LOC_Os06g02210
LOC_Os06g02480
LOC_Os06g02800
LOC_Os06g02810
LOC_Os06g04020
LOC_Os06g04380
LOC_Os06g04460
LOC_Os06g04510
LOC_Os06g05740
LOC_Os06g06050
LOC_Os06g06290
LOC_Os06g06390
LOC_Os06g06940
LOC_Os06g07100
LOC_Os06g07932
LOC_Os06g08110
LOC_Os06g08900
LOC_Os06g08910
LOC_Os06g09230
LOC_Os06g10210
LOC_Os06g10350
LOC_Os06g11180
LOC_Os06g11860
LOC_Os06g12030
LOC_Os06g12320
LOC_Os06g12460
LOC_Os06g18820
LOC_Os06g18930
LOC_Os06g19370
LOC_Os06g19444
LOC_Os06g21570
LOC_Os06g26234
LOC_Os06g28194
LOC_Os06g28630
LOC_Os06g29700
LOC_Os06g30179
LOC_Os06g32590
LOC_Os06g32650
LOC_Os06g35200
LOC_Os06g35780
LOC_Os06g36040
LOC_Os06g36340
LOC_Os06g37610
LOC_Os06g39230
LOC_Os06g39260
LOC_Os06g39480
LOC_Os06g40470
LOC_Os06g40580
LOC_Os06g41060
LOC_Os06g43150
LOC_Os06g43990
LOC_Os06g44040
LOC_Os06g44180
LOC_Os06g44260
LOC_Os06g44540
LOC_Os06g45140
LOC_Os06g45370
LOC_Os06g46140
LOC_Os06g47130
LOC_Os06g47210
LOC_Os06g47530
LOC_Os06g47760
LOC_Os06g48030
LOC_Os06g48650
LOC_Os06g49680
LOC_Os06g50080
LOC_Os06g50230
LOC_Os06g51070
LOC_Os07g01250
LOC_Os07g01810
LOC_Os07g02460
LOC_Os07g02480
LOC_Os07g02520
LOC_Os07g02660
LOC_Os07g03050
LOC_Os07g04480
LOC_Os07g05040
LOC_Os07g05360
LOC_Os07g05365
LOC_Os07g05480
LOC_Os07g05720
LOC_Os07g06440
LOC_Os07g06700
LOC_Os07g07050
LOC_Os07g07520
LOC_Os07g07770
LOC_Os07g08040
LOC_Os07g08140
LOC_Os07g08290
LOC_Os07g08390
LOC_Os07g10060
LOC_Os07g10440
LOC_Os07g10460
LOC_Os07g10770
LOC_Os07g12160
LOC_Os07g12540
LOC_Os07g12630
LOC_Os07g13870
LOC_Os07g14100
LOC_Os07g14270
LOC_Os07g14540
LOC_Os07g14850
LOC_Os07g15190
LOC_Os07g15880
LOC_Os07g16600
LOC_Os07g17250
LOC_Os07g19220
LOC_Os07g20420
LOC_Os07g23244
LOC_Os07g24230
LOC_Os07g26630
LOC_Os07g27310
LOC_Os07g27980
LOC_Os07g28000
LOC_Os07g28010
LOC_Os07g28020
LOC_Os07g28030
LOC_Os07g28850
LOC_Os07g29410
LOC_Os07g32570
LOC_Os07g32950
LOC_Os07g33200
LOC_Os07g33240
LOC_Os07g33480
LOC_Os07g34598
LOC_Os07g34650
LOC_Os07g34730
LOC_Os07g34830
LOC_Os07g34950
LOC_Os07g34964
LOC_Os07g35260
LOC_Os07g35290
LOC_Os07g35790
LOC_Os07g35880
LOC_Os07g36780
LOC_Os07g37130
LOC_Os07g38430
LOC_Os07g38440
LOC_Os07g38490
LOC_Os07g39290
LOC_Os07g39740
LOC_Os07g40120
LOC_Os07g40580
LOC_Os07g40620
LOC_Os07g41230
LOC_Os07g41380
LOC_Os07g41420
LOC_Os07g41710
LOC_Os07g42354
LOC_Os07g42714
LOC_Os07g43560
LOC_Os07g43740
LOC_Os07g43925
LOC_Os07g45370
LOC_Os07g47140
LOC_Os07g47250
LOC_Os07g47350
LOC_Os07g47370
LOC_Os07g47400
LOC_Os07g47490
LOC_Os07g47670
LOC_Os07g48010
LOC_Os07g48260
LOC_Os07g48370
LOC_Os07g48550
LOC_Os07g48660
LOC_Os07g48700
LOC_Os07g48730
LOC_Os07g49070
LOC_Os07g49114
LOC_Os08g01430
LOC_Os08g02670
LOC_Os08g04400
LOC_Os08g04450
LOC_Os08g04840
LOC_Os08g05440
LOC_Os08g08430
LOC_Os08g08586
LOC_Os08g08650
LOC_Os08g08850
LOC_Os08g09110
LOC_Os08g09290
LOC_Os08g09840
LOC_Os08g10080
LOC_Os08g10300
LOC_Os08g10550
LOC_Os08g10630
LOC_Os08g10730
LOC_Os08g13630
LOC_Os08g14660
LOC_Os08g14950
LOC_Os08g15050
LOC_Os08g16130
LOC_Os08g16810
LOC_Os08g16830
LOC_Os08g17680
LOC_Os08g19550
LOC_Os08g23280
LOC_Os08g23810
LOC_Os08g26270
LOC_Os08g26980
LOC_Os08g27030
LOC_Os08g29570
LOC_Os08g31030
LOC_Os08g32540
LOC_Os08g32970
LOC_Os08g33100
LOC_Os08g34150
LOC_Os08g34360
LOC_Os08g35210
LOC_Os08g37820
LOC_Os08g38170
LOC_Os08g38300
LOC_Os08g38710
LOC_Os08g38890
LOC_Os08g38910
LOC_Os08g40530
LOC_Os08g40790
LOC_Os08g40930
LOC_Os08g41100
LOC_Os08g41500
LOC_Os08g41880
LOC_Os08g42390
LOC_Os08g42910
LOC_Os08g43320
LOC_Os08g44210
LOC_Os08g44530
LOC_Os08g44760
LOC_Os09g07120
LOC_Os09g07800
LOC_Os09g10204
LOC_Os09g10760
LOC_Os09g13470
LOC_Os09g13600
LOC_Os09g14600
LOC_Os09g15810
LOC_Os09g15820
LOC_Os09g17930
LOC_Os09g19140
LOC_Os09g19700
LOC_Os09g21370
LOC_Os09g21520
LOC_Os09g23140
LOC_Os09g23550
LOC_Os09g25784
LOC_Os09g26160
LOC_Os09g26460
LOC_Os09g26620
LOC_Os09g26810
LOC_Os09g26830
LOC_Os09g27010
LOC_Os09g27830
LOC_Os09g27920
LOC_Os09g28390
LOC_Os09g29130
LOC_Os09g29404
LOC_Os09g29540
LOC_Os09g29560
LOC_Os09g30360
LOC_Os09g30466
LOC_Os09g31031
LOC_Os09g31080
LOC_Os09g31466
LOC_Os09g31970
LOC_Os09g32470
LOC_Os09g33620
LOC_Os09g33680
LOC_Os09g33920
LOC_Os09g35540
LOC_Os09g35630
LOC_Os09g36600
LOC_Os09g36670
LOC_Os09g36860
LOC_Os09g36930
LOC_Os09g37394
LOC_Os09g37480
LOC_Os09g37540
LOC_Os09g37590
LOC_Os09g38020
LOC_Os09g38130
LOC_Os09g38340
LOC_Os09g38370
LOC_Os09g38772
LOC_Os09g38777
LOC_Os09g39650
LOC_Os10g01134
LOC_Os10g01290
LOC_Os10g02040
LOC_Os10g03320
LOC_Os10g03730
LOC_Os10g04290
LOC_Os10g04770
LOC_Os10g05088
LOC_Os10g05570
LOC_Os10g08474
LOC_Os10g09290
LOC_Os10g12080
LOC_Os10g12354
LOC_Os10g12480
LOC_Os10g15164
LOC_Os10g15240
LOC_Os10g20230
LOC_Os10g22570
LOC_Os10g23130
LOC_Os10g24094
LOC_Os10g24100
LOC_Os10g24970
LOC_Os10g25010
LOC_Os10g25020
LOC_Os10g25040
LOC_Os10g25290
LOC_Os10g25360
LOC_Os10g25565
LOC_Os10g27090
LOC_Os10g28080
LOC_Os10g28600
LOC_Os10g28680
LOC_Os10g29220
LOC_Os10g29670
LOC_Os10g30070
LOC_Os10g30080
LOC_Os10g30210
LOC_Os10g30540
LOC_Os10g30550
LOC_Os10g30600
LOC_Os10g30790
LOC_Os10g32348
LOC_Os10g32540
LOC_Os10g32940
LOC_Os10g33630
LOC_Os10g33990
LOC_Os10g34910
LOC_Os10g34930
LOC_Os10g35240
LOC_Os10g35530
LOC_Os10g35770
LOC_Os10g36000
LOC_Os10g36210
LOC_Os10g36690
LOC_Os10g36960
LOC_Os10g38040
LOC_Os10g39936
LOC_Os10g40200
LOC_Os10g40550
LOC_Os10g40600
LOC_Os10g40824
LOC_Os10g40880
LOC_Os10g41190
LOC_Os10g41260
LOC_Os10g41330
LOC_Os10g41534
LOC_Os10g41640
LOC_Os10g41820
LOC_Os10g42040
LOC_Os10g42100
LOC_Os10g42700
LOC_Os10g42999
LOC_Os11g01220
LOC_Os11g01480
LOC_Os11g01550
LOC_Os11g02530
LOC_Os11g03130
LOC_Os11g03580
LOC_Os11g03720
LOC_Os11g04409
LOC_Os11g04710
LOC_Os11g05050
LOC_Os11g05070
LOC_Os11g05820
LOC_Os11g06930
LOC_Os11g07050
LOC_Os11g07160
LOC_Os11g08590
LOC_Os11g08830
LOC_Os11g09460
LOC_Os11g09690
LOC_Os11g10290
LOC_Os11g12320
LOC_Os11g23880
LOC_Os11g24510
LOC_Os11g25560
LOC_Os11g32720
LOC_Os11g32750
LOC_Os11g34130
LOC_Os11g35710
LOC_Os11g37200
LOC_Os11g37560
LOC_Os11g38870
LOC_Os11g39160
LOC_Os11g39320
LOC_Os11g40450
LOC_Os11g40590
LOC_Os11g41210
LOC_Os11g41500
LOC_Os11g41600
LOC_Os11g41910
LOC_Os11g42500
LOC_Os11g42800
LOC_Os11g42930
LOC_Os11g44680
LOC_Os11g44750
LOC_Os11g44790
LOC_Os11g44920
LOC_Os11g45060
LOC_Os11g45190
LOC_Os11g45920
LOC_Os11g45930
LOC_Os11g47130
LOC_Os11g47320
LOC_Os11g47370
LOC_Os11g47960
LOC_Os11g47980
LOC_Os12g01449
LOC_Os12g01490
LOC_Os12g02640
LOC_Os12g03190
LOC_Os12g04204
LOC_Os12g04500
LOC_Os12g04590
LOC_Os12g05080
LOC_Os12g05650
LOC_Os12g06300
LOC_Os12g06330
LOC_Os12g07810
LOC_Os12g08760
LOC_Os12g08830
LOC_Os12g09220
LOC_Os12g09700
LOC_Os12g09720
LOC_Os12g10190
LOC_Os12g10720
LOC_Os12g12514
LOC_Os12g13120
LOC_Os12g13660
LOC_Os12g17880
LOC_Os12g23280
LOC_Os12g24320
LOC_Os12g24550
LOC_Os12g24800
LOC_Os12g25490
LOC_Os12g31850
LOC_Os12g34510
LOC_Os12g36910
LOC_Os12g36920
LOC_Os12g37740
LOC_Os12g37770
LOC_Os12g38150
LOC_Os12g38170
LOC_Os12g38270
LOC_Os12g38920
LOC_Os12g39120
LOC_Os12g39160
LOC_Os12g39220
LOC_Os12g39360
LOC_Os12g40380
LOC_Os12g40390
LOC_Os12g41680
LOC_Os12g41830
LOC_Os12g41950
LOC_Os12g42040
LOC_Os12g42590
LOC_Os12g43340
LOC_Os12g43580
LOC_Os12g43590
LOC_Os12g43640
LOC_Os12g44230

## Sheet: TableS4
Supplementary Table 4. CGs in response to s-metolachlor application.
Gene
LOC_Os02g37700
LOC_Os02g45930
LOC_Os03g03724
LOC_Os03g38540
LOC_Os03g61900
LOC_Os04g18090
LOC_Os04g40630
LOC_Os04g49370
LOC_Os05g09500
LOC_Os05g13420
LOC_Os05g35470
LOC_Os06g02540
LOC_Os06g20200
LOC_Os06g45090
LOC_Os06g45140
LOC_Os07g39780
LOC_Os12g07940
LOC_Os01g72130
LOC_Os02g39330
LOC_Os02g42585
LOC_Os02g42990
LOC_Os02g45780
LOC_Os02g49840
LOC_Os03g06630
LOC_Os03g08460
LOC_Os03g11900
LOC_Os03g45250
LOC_Os03g57310
LOC_Os03g58890
LOC_Os03g60080
LOC_Os04g30010
LOC_Os04g52190
LOC_Os04g54220
LOC_Os05g08900
LOC_Os05g48810
LOC_Os06g06900
LOC_Os06g38830
LOC_Os06g47910
LOC_Os07g28850
LOC_Os07g35260
LOC_Os07g37280
LOC_Os07g43740
LOC_Os07g48260
LOC_Os08g29570
LOC_Os08g40910
LOC_Os09g28210
LOC_Os09g29600
LOC_Os10g30790
LOC_Os11g09010
LOC_Os11g30760
LOC_Os12g02450

## Sheet: TableS5
Supplementary Table 5. CGs in response to fenclorim application.
Gene
LOC_Os01g03950
LOC_Os01g08600
LOC_Os01g08700
LOC_Os01g10580
LOC_Os01g15830
LOC_Os01g39830
LOC_Os01g40120
LOC_Os01g48380
LOC_Os01g48940
LOC_Os01g51980
LOC_Os01g53370
LOC_Os01g53800
LOC_Os01g54080
LOC_Os01g54590
LOC_Os01g56620
LOC_Os01g57350
LOC_Os01g58680
LOC_Os01g59190
LOC_Os01g62980
LOC_Os01g63210
LOC_Os01g65210
LOC_Os01g65460
LOC_Os01g67360
LOC_Os01g74450
LOC_Os02g01380
LOC_Os02g01765
LOC_Os02g01890
LOC_Os02g02770
LOC_Os02g05744
LOC_Os02g07400
LOC_Os02g07740
LOC_Os02g07800
LOC_Os02g09790
LOC_Os02g09930
LOC_Os02g10860
LOC_Os02g11020
LOC_Os02g14440
LOC_Os02g15280
LOC_Os02g16670
LOC_Os02g30320
LOC_Os02g32840
LOC_Os02g33400
LOC_Os02g34600
LOC_Os02g34860
LOC_Os02g37590
LOC_Os02g38970
LOC_Os02g41520
LOC_Os02g45930
LOC_Os02g47605
LOC_Os02g50320
LOC_Os02g51950
LOC_Os02g52150
LOC_Os02g54060
LOC_Os03g02240
LOC_Os03g02670
LOC_Os03g05270
LOC_Os03g06200
LOC_Os03g16460
LOC_Os03g16780
LOC_Os03g17200
LOC_Os03g17800
LOC_Os03g18170
LOC_Os03g18980
LOC_Os03g27230
LOC_Os03g30830
LOC_Os03g31690
LOC_Os03g32470
LOC_Os03g36960
LOC_Os03g44420
LOC_Os03g49730
LOC_Os03g51650
LOC_Os03g53540
LOC_Os03g56950
LOC_Os03g60509
LOC_Os03g64320
LOC_Os04g25784
LOC_Os04g31760
LOC_Os04g33600
LOC_Os04g33610
LOC_Os04g38310
LOC_Os04g39290
LOC_Os04g41570
LOC_Os04g42620
LOC_Os04g43650
LOC_Os04g46980
LOC_Os04g49450
LOC_Os04g51350
LOC_Os04g52260
LOC_Os04g54870
LOC_Os04g58860
LOC_Os05g03960
LOC_Os05g13860
LOC_Os05g30010
LOC_Os05g30220
LOC_Os05g32170
LOC_Os05g33900
LOC_Os05g36040
LOC_Os05g38170
LOC_Os05g38680
LOC_Os05g40330
LOC_Os05g44610
LOC_Os05g47850
LOC_Os05g49920
LOC_Os05g51240
LOC_Os05g51470
LOC_Os06g05130
LOC_Os06g05160
LOC_Os06g08032
LOC_Os06g09560
LOC_Os06g09880
LOC_Os06g09900
LOC_Os06g11400
LOC_Os06g14240
LOC_Os06g20150
LOC_Os06g26234
LOC_Os06g30179
LOC_Os06g33200
LOC_Os06g35200
LOC_Os06g39230
LOC_Os06g40850
LOC_Os06g41710
LOC_Os06g42800
LOC_Os06g43620
LOC_Os06g45980
LOC_Os07g04190
LOC_Os07g08140
LOC_Os07g09710
LOC_Os07g12160
LOC_Os07g26990
LOC_Os07g29500
LOC_Os07g30810
LOC_Os07g31500
LOC_Os07g34750
LOC_Os07g38460
LOC_Os07g39740
LOC_Os07g40690
LOC_Os07g42410
LOC_Os07g47490
LOC_Os07g48010
LOC_Os07g48040
LOC_Os07g48050
LOC_Os07g48750
LOC_Os08g03670
LOC_Os08g04770
LOC_Os08g06380
LOC_Os08g09230
LOC_Os08g10630
LOC_Os08g12449
LOC_Os08g23430
LOC_Os08g31030
LOC_Os08g33940
LOC_Os08g38710
LOC_Os08g43400
LOC_Os08g44760
LOC_Os09g26260
LOC_Os09g31031
LOC_Os09g36730
LOC_Os09g37330
LOC_Os09g37394
LOC_Os09g37480
LOC_Os09g38420
LOC_Os09g38440
LOC_Os10g21940
LOC_Os10g22590
LOC_Os10g29470
LOC_Os10g30550
LOC_Os10g33790
LOC_Os10g33990
LOC_Os10g36000
LOC_Os10g36060
LOC_Os10g37860
LOC_Os11g01740
LOC_Os11g02310
LOC_Os11g18940
LOC_Os11g35050
LOC_Os12g07160
LOC_Os12g07390
LOC_Os12g10784
LOC_Os12g24580
LOC_Os12g41630
LOC_Os12g43340
LOC_Os12g43830

## Sheet: TableS6
Supplementary Table 6. CGs in response to metcamifen application.
Gene
LOC_Os01g01280
LOC_Os01g04120
LOC_Os01g04620
LOC_Os01g08440
LOC_Os01g09020
LOC_Os01g09870
LOC_Os01g10210
LOC_Os01g17396
LOC_Os01g21250
LOC_Os01g24070
LOC_Os01g25810
LOC_Os01g28680
LOC_Os01g40870
LOC_Os01g47690
LOC_Os01g51410
LOC_Os01g52260
LOC_Os01g52550
LOC_Os01g63620
LOC_Os01g63930
LOC_Os01g66120
LOC_Os01g67850
LOC_Os01g72120
LOC_Os01g72130
LOC_Os01g73910
LOC_Os01g74490
LOC_Os02g07650
LOC_Os02g07690
LOC_Os02g09240
LOC_Os02g10880
LOC_Os02g13300
LOC_Os02g32840
LOC_Os02g36340
LOC_Os02g42990
LOC_Os02g45780
LOC_Os02g47560
LOC_Os02g51910
LOC_Os02g53040
LOC_Os03g06200
LOC_Os03g08460
LOC_Os03g09940
LOC_Os03g12860
LOC_Os03g13030
LOC_Os03g16670
LOC_Os03g22160
LOC_Os03g32420
LOC_Os03g39760
LOC_Os03g40100
LOC_Os03g51650
LOC_Os03g53640
LOC_Os03g53750
LOC_Os03g53930
LOC_Os03g60080
LOC_Os04g02050
LOC_Os04g14810
LOC_Os04g33190
LOC_Os04g39980
LOC_Os04g44510
LOC_Os04g46980
LOC_Os04g52900
LOC_Os04g54240
LOC_Os04g55720
LOC_Os04g56230
LOC_Os04g57340
LOC_Os04g58710
LOC_Os05g03820
LOC_Os05g11428
LOC_Os05g12450
LOC_Os05g30350
LOC_Os05g34830
LOC_Os05g39770
LOC_Os05g41610
LOC_Os05g42350
LOC_Os05g45020
LOC_Os05g45090
LOC_Os06g01340
LOC_Os06g03520
LOC_Os06g04210
LOC_Os06g07210
LOC_Os06g11300
LOC_Os06g28950
LOC_Os06g33200
LOC_Os06g39520
LOC_Os06g46140
LOC_Os06g47470
LOC_Os06g47530
LOC_Os06g51290
LOC_Os07g13770
LOC_Os07g36170
LOC_Os07g36544
LOC_Os07g47670
LOC_Os07g49114
LOC_Os08g02700
LOC_Os08g06280
LOC_Os08g33210
LOC_Os08g41400
LOC_Os09g16330
LOC_Os09g27030
LOC_Os09g28940
LOC_Os09g31130
LOC_Os09g33680
LOC_Os09g37330
LOC_Os09g37710
LOC_Os09g38130
LOC_Os10g01134
LOC_Os10g02380
LOC_Os10g32940
LOC_Os10g38610
LOC_Os10g41260
LOC_Os10g42299
LOC_Os11g01550
LOC_Os11g04104
LOC_Os11g05190
LOC_Os11g41160
LOC_Os12g03420
LOC_Os12g03899
LOC_Os12g29740
LOC_Os12g32230
LOC_Os12g36770
LOC_Os12g40180
LOC_Os12g41630
LOC_Os12g42280
LOC_Os12g44370

## Sheet: TableS7
Supplementary Table 7. CCGs in response to GA3 application.
Gene
LOC_Os01g04570
LOC_Os01g04580
LOC_Os01g04620
LOC_Os01g06220
LOC_Os01g10260
LOC_Os01g10990
LOC_Os01g15900
LOC_Os01g41660
LOC_Os01g43590
LOC_Os01g45060
LOC_Os01g45200
LOC_Os01g45990
LOC_Os01g49310
LOC_Os01g53880
LOC_Os01g55240
LOC_Os01g59690
LOC_Os01g62500
LOC_Os01g62980
LOC_Os01g66120
LOC_Os01g67480
LOC_Os01g68020
LOC_Os02g11020
LOC_Os02g13100
LOC_Os02g13370
LOC_Os02g35490
LOC_Os02g37700
LOC_Os02g39850
LOC_Os02g43170
LOC_Os02g44980
LOC_Os02g45930
LOC_Os02g48080
LOC_Os02g53160
LOC_Os02g53750
LOC_Os02g57560
LOC_Os03g02750
LOC_Os03g03724
LOC_Os03g04100
LOC_Os03g07360
LOC_Os03g08490
LOC_Os03g10640
LOC_Os03g12890
LOC_Os03g15270
LOC_Os03g16670
LOC_Os03g22634
LOC_Os03g29770
LOC_Os03g38540
LOC_Os03g50960
LOC_Os03g59570
LOC_Os03g61900
LOC_Os04g18090
LOC_Os04g24220
LOC_Os04g31120
LOC_Os04g31924
LOC_Os04g32000
LOC_Os04g33610
LOC_Os04g41460
LOC_Os04g43650
LOC_Os04g45290
LOC_Os04g45970
LOC_Os04g46860
LOC_Os04g46980
LOC_Os04g49370
LOC_Os04g49450
LOC_Os04g49757
LOC_Os04g51820
LOC_Os04g58710
LOC_Os05g03640
LOC_Os05g04550
LOC_Os05g32420
LOC_Os05g32970
LOC_Os05g37730
LOC_Os05g41450
LOC_Os05g42180
LOC_Os05g46240
LOC_Os05g46460
LOC_Os05g47650
LOC_Os05g47870
LOC_Os05g51150
LOC_Os06g04070
LOC_Os06g12230
LOC_Os06g19444
LOC_Os06g20200
LOC_Os06g36390
LOC_Os06g43990
LOC_Os06g45090
LOC_Os06g45140
LOC_Os06g47800
LOC_Os06g47930
LOC_Os07g03170
LOC_Os07g37320
LOC_Os07g38440
LOC_Os07g39780
LOC_Os07g43530
LOC_Os07g47670
LOC_Os08g10290
LOC_Os08g34360
LOC_Os08g36480
LOC_Os08g36500
LOC_Os08g37345
LOC_Os09g19970
LOC_Os09g25740
LOC_Os09g27135
LOC_Os09g30160
LOC_Os09g36220
LOC_Os09g38130
LOC_Os10g25290
LOC_Os10g33040
LOC_Os10g39520
LOC_Os10g40600
LOC_Os10g41120
LOC_Os11g02520
LOC_Os11g03580
LOC_Os11g04710
LOC_Os11g38870
LOC_Os11g41600
LOC_Os12g03822
LOC_Os12g07940
LOC_Os12g17880
LOC_Os12g25490
LOC_Os12g39220
LOC_Os12g44030
LOC_Os01g36220
LOC_Os01g71970
LOC_Os02g04860
LOC_Os02g15120
LOC_Os02g42585
LOC_Os02g42990
LOC_Os02g46620
LOC_Os02g49840
LOC_Os02g52150
LOC_Os03g02260
LOC_Os03g02300
LOC_Os03g06630
LOC_Os03g08460
LOC_Os03g15960
LOC_Os03g25770
LOC_Os03g51920
LOC_Os03g55310
LOC_Os03g58890
LOC_Os04g25784
LOC_Os04g28420
LOC_Os04g33660
LOC_Os04g36830
LOC_Os04g43710
LOC_Os04g44100
LOC_Os04g45810
LOC_Os04g54220
LOC_Os04g54230
LOC_Os04g54240
LOC_Os04g54300
LOC_Os04g55090
LOC_Os05g48810
LOC_Os05g50600
LOC_Os06g03520
LOC_Os06g09560
LOC_Os06g12530
LOC_Os06g14240
LOC_Os06g35200
LOC_Os06g46060
LOC_Os06g47910
LOC_Os06g49680
LOC_Os06g50080
LOC_Os06g51260
LOC_Os07g08140
LOC_Os07g24230
LOC_Os07g37280
LOC_Os07g44950
LOC_Os08g09290
LOC_Os08g09690
LOC_Os08g15050
LOC_Os08g33660
LOC_Os08g34240
LOC_Os08g34500
LOC_Os08g37010
LOC_Os08g40910
LOC_Os09g28210
LOC_Os09g31482
LOC_Os10g05130
LOC_Os10g28340
LOC_Os10g29220
LOC_Os10g32770
LOC_Os12g14140
LOC_Os12g39160

## Sheet: TableS8
Supplementary Table 8. No. of genes in each co-expression module.
Module name	Gene number
yellow	862
green	488
red	170
turquoise	4480
black	57
blue	2557
brown	1777

## Sheet: TableS9
Supplementary Table 9. Effect of herbicide application on herbicide resistance genes directly regulated by OsCCA1.
gene_id	gene_name	log2FC(Glyphosate)	FDR(Glyphosate)	log2FC(Fenclorim)	FDR(Fenclorim)	log2FC(Metcamifen)	FDR(Metcamifen)	log2FC(S-Metolachlor)	FDR(S-Metolachlor)	log2FC(GA3)	FDR(GA3)
LOC_Os03g55260	OsCYP81A12	2.94514	0.00673829	-0.239331	0.861738	1.05699	NA	0.718208	0.73868	1.73288	0.172705
LOC_Os02g30080	OsCYP81E22	-0.531992	0.586108	-0.581069	0.751937	-0.847526	NA	-0.378941	0.730156	-0.162532	0.897051
LOC_Os10g08540	OsCYP76C2	-3.07108	0.0449156	-0.885604	0.204492	5.14866	2.40933e-43	-0.253562	0.937184	0.268783	0.885625
LOC_Os10g08474	OsCYP76C4	-1.14865	1.68527e-14	-0.143315	0.894945	0	NA	0.0500037	0.982574	-0.639256	0.240629
LOC_Os06g36650	OsABCC8	0.391505	0.895217	-1.22937	0.262816	-0.316317	0.999864	-0.0872785	0.974674	-0.047579	0.969078
